# Supplementary material for: The FAM171A2 gene is a key regulator of progranulin expression and modifies the risk of multiple neurodegenerative diseases
Source: PubMed Central journal article supplement — Sci Adv. 2020 Oct 21;6(43):eabb3063. doi: 10.1126/sciadv.abb3063 (PMC7577723; doi:10.1126/sciadv.abb3063), 2020-10-21
Supplement: abb3063_SM.pdf [file abb3063_SM.pdf]

## Supplementary Materials for

### **The *FAM171A2* gene is a key regulator of progranulin expression and modifies the risk of multiple neurodegenerative diseases**

Wei Xu, Si-Da Han, Can Zhang, Jie-Qiong Li, Yan-Jiang Wang, Chen-Chen Tan, Hong-Qi Li, Qiang Dong, Cui Mei, Lan Tan, Jin-Tai Yu\*

\*Corresponding author. Email: jintai\_yu@fudan.edu.cn

Published 21 October 2020, *Sci. Adv.* **6**, eabb3063 (2020)  
DOI: 10.1126/sciadv.abb3063

#### **This PDF file includes:**

Figs. S1 to S5  
Tables S1 to S10

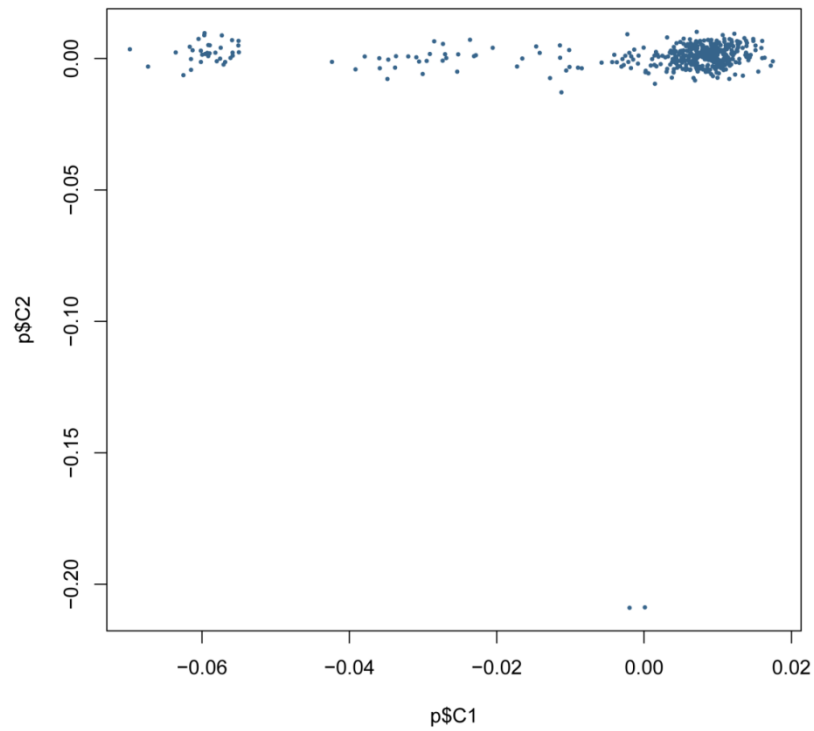

**Figure S1 MDS plot of ADNI non-Hispanic Caucasian samples.** The unanticipated duplicates and cryptic relatedness among samples were examined using pairwise genome-wide estimates of proportion identity-by-descent. Samples seemed to form generally tight clusters except for two outliers based on the second MDS component (at bottom of plot; IID = 024\_S\_4084 and 024\_S\_2239), suggesting potential population substructure.

**Table S1 Suggestive loci associated with CSF PGRN levels**

| CHR | SNP         | BP       | AI       | BETA      | STAT   | Source     | GWAS p-value | empiric p-value | permutation based corrected empiric p-value |
|-----|-------------|----------|----------|-----------|--------|------------|--------------|-----------------|---------------------------------------------|
| 17  | rs11654428  | 42555787 | G        | -0.002345 | -5.52  | Imputation | 5.92E-08     | 0.0002          | 0.03459                                     |
| 17  | rs9891016   | 42555485 | A        | -0.002308 | -5.435 | Genotyping | 9.27E-08     | 0.0002          | 0.05559                                     |
| 17  | rs575341342 | 42590812 | C        | -0.002219 | -5.232 | Imputation | 2.65E-07     | 0.0002          | 0.147                                       |
| 17  | rs4793113   | 42580061 | C        | 0.0021    | 5.202  | Imputation | 3.08E-07     | 0.0002          | 0.1678                                      |
| 17  | rs28614047  | 42583651 | A        | 0.0021    | 5.202  | Imputation | 3.08E-07     | 0.0002          | 0.1678                                      |
| 17  | rs7216502   | 42589924 | A        | 0.0021    | 5.202  | Imputation | 3.08E-07     | 0.0002          | 0.1678                                      |
| 17  | rs72824760  | 42560209 | A        | 0.002085  | 5.133  | Imputation | 4.35E-07     | 0.0002          | 0.2288                                      |
| 17  | rs9899573   | 42549880 | T        | 0.002075  | 5.119  | Imputation | 4.68E-07     | 0.0002          | 0.2448                                      |
| 17  | rs11867692  | 42570346 | T        | 0.002075  | 5.119  | Genotyping | 4.68E-07     | 0.0002          | 0.2448                                      |
| 17  | rs201470041 | 42596255 | TAA      | -0.002136 | -5.111 | Imputation | 4.87E-07     | 0.0002          | 0.2501                                      |
| 17  | rs11657509  | 42598428 | G        | -0.002136 | -5.111 | Imputation | 4.87E-07     | 0.0002          | 0.2501                                      |
| 17  | rs2045087   | 42482291 | A        | 0.002065  | 5.068  | Imputation | 6.02E-07     | 0.0002          | 0.2977                                      |
| 17  | rs11079122  | 42485044 | C        | 0.002065  | 5.068  | Imputation | 6.02E-07     | 0.0002          | 0.2977                                      |
| 17  | rs67633759  | 42515327 | A        | 0.002065  | 5.068  | Imputation | 6.02E-07     | 0.0002          | 0.2977                                      |
| 17  | rs9905022   | 42601674 | C        | -0.002103 | -5.061 | Imputation | 6.23E-07     | 0.0002          | 0.3045                                      |
| 17  | rs12103601  | 42601849 | C        | -0.002103 | -5.061 | Imputation | 6.23E-07     | 0.0002          | 0.3045                                      |
| 17  | rs200400827 | 42602225 | C        | -0.002103 | -5.061 | Imputation | 6.23E-07     | 0.0002          | 0.3045                                      |
| 17  | rs112190958 | 42602517 | G        | -0.002103 | -5.061 | Imputation | 6.23E-07     | 0.0002          | 0.3045                                      |
| 17  | rs4130977   | 42603714 | G        | -0.002103 | -5.061 | Imputation | 6.23E-07     | 0.0002          | 0.3045                                      |
| 17  | rs55753235  | 42605737 | C        | -0.002103 | -5.061 | Imputation | 6.23E-07     | 0.0002          | 0.3045                                      |
| 17  | rs9889793   | 42608923 | G        | -0.002103 | -5.061 | Imputation | 6.23E-07     | 0.0002          | 0.3045                                      |
| 17  | rs3924066   | 42589478 | C        | -0.002109 | -5.048 | Imputation | 6.64E-07     | 0.0002          | 0.3201                                      |
| 17  | rs8071155   | 42592202 | A        | -0.002109 | -5.048 | Imputation | 6.64E-07     | 0.0002          | 0.3201                                      |
| 17  | rs9890329   | 42594762 | G        | -0.002109 | -5.048 | Imputation | 6.64E-07     | 0.0002          | 0.3201                                      |
| 17  | rs8064751   | 42596589 | A        | -0.0021   | -5.027 | Imputation | 7.37E-07     | 0.0002          | 0.3501                                      |
| 17  | rs62081230  | 42530868 | G        | -0.00209  | -4.973 | Imputation | 9.58E-07     | 0.0002          | 0.4295                                      |
| 17  | rs62081232  | 42532761 | C        | -0.00209  | -4.973 | Imputation | 9.58E-07     | 0.0002          | 0.4295                                      |
| 17  | rs6503373   | 42538690 | T        | -0.00209  | -4.973 | Imputation | 9.58E-07     | 0.0002          | 0.4295                                      |
| 17  | rs11347764  | 42539230 | TG       | -0.00209  | -4.973 | Imputation | 9.58E-07     | 0.0002          | 0.4295                                      |
| 17  | rs7502443   | 42546874 | C        | -0.00209  | -4.973 | Imputation | 9.58E-07     | 0.0002          | 0.4295                                      |
| 17  | rs9911079   | 42547688 | C        | -0.00209  | -4.973 | Imputation | 9.58E-07     | 0.0002          | 0.4295                                      |
| 17  | rs7219873   | 42547981 | C        | -0.00209  | -4.973 | Imputation | 9.58E-07     | 0.0002          | 0.4295                                      |
| 17  | rs4792945   | 42552832 | C        | -0.00209  | -4.973 | Imputation | 9.58E-07     | 0.0002          | 0.4295                                      |
| 17  | rs9901031   | 42553667 | G        | -0.00209  | -4.973 | Imputation | 9.58E-07     | 0.0002          | 0.4295                                      |
| 17  | rs7223739   | 42554600 | T        | -0.00209  | -4.973 | Imputation | 9.58E-07     | 0.0002          | 0.4295                                      |
| 17  | rs7223781   | 42554675 | T        | -0.00209  | -4.973 | Imputation | 9.58E-07     | 0.0002          | 0.4295                                      |
| 17  | rs150526952 | 42555366 | TGGGGTGG | -0.00209  | -4.973 | Imputation | 9.58E-07     | 0.0002          | 0.4295                                      |
| 17  | rs7503521   | 42560907 | G        | -0.00209  | -4.973 | Imputation | 9.58E-07     | 0.0002          | 0.4295                                      |
| 17  | rs7502468   | 42562632 | C        | -0.00209  | -4.973 | Imputation | 9.58E-07     | 0.0002          | 0.4295                                      |
| 17  | rs62078767  | 42568013 | T        | -0.00209  | -4.973 | Imputation | 9.58E-07     | 0.0002          | 0.4295                                      |
| 17  | rs4793112   | 42572457 | C        | -0.00209  | -4.973 | Imputation | 9.58E-07     | 0.0002          | 0.4295                                      |
| 17  | rs7223926   | 42578882 | G        | -0.00209  | -4.973 | Imputation | 9.58E-07     | 0.0002          | 0.4295                                      |
| 17  | rs7210568   | 42578965 | T        | -0.00209  | -4.973 | Imputation | 9.58E-07     | 0.0002          | 0.4295                                      |
| 17  | rs148261873 | 42542461 | A        | -0.002073 | -4.965 | Imputation | 9.98E-07     | 0.0002          | 0.4415                                      |
| 17  | rs4792946   | 42582577 | T        | -0.002073 | -4.965 | Imputation | 9.98E-07     | 0.0002          | 0.4415                                      |
| 17  | rs4793114   | 42583236 | G        | -0.002073 | -4.965 | Imputation | 9.98E-07     | 0.0002          | 0.4415                                      |
| 17  | rs4793115   | 42584716 | T        | -0.002073 | -4.965 | Imputation | 9.98E-07     | 0.0002          | 0.4415                                      |
| 17  | rs12936626  | 42584877 | T        | -0.002073 | -4.965 | Imputation | 9.98E-07     | 0.0002          | 0.4415                                      |
| 17  | rs8064662   | 42588083 | A        | -0.002073 | -4.965 | Imputation | 9.98E-07     | 0.0002          | 0.4415                                      |
| 17  | rs7212357   | 42589008 | C        | -0.002073 | -4.965 | Imputation | 9.98E-07     | 0.0002          | 0.4415                                      |
| 17  | rs8071245   | 42592632 | C        | -0.002073 | -4.965 | Imputation | 9.98E-07     | 0.0002          | 0.4415                                      |
| 17  | rs7219216   | 42593325 | C        | -0.002073 | -4.965 | Imputation | 9.98E-07     | 0.0002          | 0.4415                                      |
| 17  | rs147058394 | 42502390 | AAAC     | -0.002081 | -4.942 | Imputation | 1.12E-06     | 0.0002          | 0.4825                                      |
| 17  | rs55758339  | 42471631 | T        | -0.002074 | -4.922 | Imputation | 1.23E-06     | 0.0002          | 0.5171                                      |
| 17  | rs147675276 | 42561193 | TTTG     | 0.001996  | 4.921  | Imputation | 1.24E-06     | 0.0002          | 0.5207                                      |
| 17  | rs4793107   | 42533404 | A        | -0.002054 | -4.89  | Imputation | 1.43E-06     | 0.0002          | 0.5723                                      |
| 17  | rs4793108   | 42533790 | G        | -0.002054 | -4.89  | Imputation | 1.43E-06     | 0.0002          | 0.5723                                      |
| 17  | rs6503371   | 42536147 | C        | -0.002054 | -4.89  | Imputation | 1.43E-06     | 0.0002          | 0.5723                                      |
| 17  | rs6503372   | 42538053 | C        | -0.002054 | -4.89  | Imputation | 1.43E-06     | 0.0002          | 0.5723                                      |
| 17  | rs28688303  | 42539569 | C        | -0.002054 | -4.89  | Imputation | 1.43E-06     | 0.0002          | 0.5723                                      |
| 17  | rs9748120   | 42540484 | T        | -0.002054 | -4.89  | Imputation | 1.43E-06     | 0.0002          | 0.5723                                      |
| 17  | rs11079156  | 42541131 | A        | -0.002054 | -4.89  | Imputation | 1.43E-06     | 0.0002          | 0.5723                                      |
| 17  | rs8071032   | 42542693 | T        | -0.002054 | -4.89  | Imputation | 1.43E-06     | 0.0002          | 0.5723                                      |
| 17  | rs7214894   | 42543705 | C        | -0.002054 | -4.89  | Imputation | 1.43E-06     | 0.0002          | 0.5723                                      |
| 17  | rs7501858   | 42549992 | G        | -0.002054 | -4.89  | Genotyping | 1.43E-06     | 0.0002          | 0.5723                                      |
| 17  | rs8077743   | 42550603 | T        | -0.002054 | -4.89  | Imputation | 1.43E-06     | 0.0002          | 0.5723                                      |
| 17  | rs4792944   | 42551549 | G        | -0.002054 | -4.89  | Imputation | 1.43E-06     | 0.0002          | 0.5723                                      |
| 17  | rs7502979   | 42554890 | G        | -0.002054 | -4.89  | Imputation | 1.43E-06     | 0.0002          | 0.5723                                      |
| 17  | rs7503752   | 42560910 | A        | -0.002054 | -4.89  | Imputation | 1.43E-06     | 0.0002          | 0.5723                                      |
| 17  | rs7503804   | 42561152 | A        | -0.002054 | -4.89  | Imputation | 1.43E-06     | 0.0002          | 0.5723                                      |
| 17  | rs4793110   | 42561923 | A        | -0.002054 | -4.89  | Imputation | 1.43E-06     | 0.0002          | 0.5723                                      |
| 17  | rs9905790   | 42565329 | T        | -0.002054 | -4.89  | Imputation | 1.43E-06     | 0.0002          | 0.5723                                      |
| 17  | rs9901244   | 42567468 | C        | -0.002054 | -4.89  | Imputation | 1.43E-06     | 0.0002          | 0.5723                                      |
| 17  | rs8074093   | 42568770 | G        | -0.002054 | -4.89  | Imputation | 1.43E-06     | 0.0002          | 0.5723                                      |
| 17  | rs4793111   | 42571104 | G        | -0.002054 | -4.89  | Imputation | 1.43E-06     | 0.0002          | 0.5723                                      |
| 17  | rs7213453   | 42574898 | A        | -0.002054 | -4.89  | Imputation | 1.43E-06     | 0.0002          | 0.5723                                      |
| 17  | rs10532706  | 42579727 | GTTT     | -0.002054 | -4.89  | Imputation | 1.43E-06     | 0.0002          | 0.5723                                      |
| 17  | rs850728    | 42464337 | A        | -0.002052 | -4.887 | Imputation | 1.45E-06     | 0.0002          | 0.5765                                      |
| 17  | rs850727    | 42464915 | C        | -0.002052 | -4.887 | Imputation | 1.45E-06     | 0.0002          | 0.5765                                      |

|    |             |           |                |           |        |            |          |        |        |
|----|-------------|-----------|----------------|-----------|--------|------------|----------|--------|--------|
| 17 | rs9903206   | 42466043  | C              | -0.002052 | -4.887 | Imputation | 1.45E-06 | 0.0002 | 0.5765 |
| 17 | rs2037958   | 42472045  | T              | -0.002052 | -4.887 | Genotyping | 1.45E-06 | 0.0002 | 0.5765 |
| 17 | rs1018358   | 42472588  | C              | -0.002052 | -4.887 | Genotyping | 1.45E-06 | 0.0002 | 0.5765 |
| 17 | rs936019    | 42475983  | G              | -0.002052 | -4.887 | Imputation | 1.45E-06 | 0.0002 | 0.5765 |
| 17 | rs11868742  | 42479392  | T              | -0.002052 | -4.887 | Imputation | 1.45E-06 | 0.0002 | 0.5765 |
| 17 | rs7223275   | 42481493  | C              | -0.002052 | -4.887 | Imputation | 1.45E-06 | 0.0002 | 0.5765 |
| 17 | rs2045088   | 42483233  | T              | -0.002052 | -4.887 | Imputation | 1.45E-06 | 0.0002 | 0.5765 |
| 17 | rs8076720   | 42484319  | C              | -0.002052 | -4.887 | Imputation | 1.45E-06 | 0.0002 | 0.5765 |
| 17 | rs4792941   | 42493020  | A              | -0.002052 | -4.887 | Imputation | 1.45E-06 | 0.0002 | 0.5765 |
| 17 | rs9897984   | 42497027  | A              | -0.002052 | -4.887 | Imputation | 1.45E-06 | 0.0002 | 0.5765 |
| 17 | rs9902493   | 42497737  | G              | -0.002052 | -4.887 | Imputation | 1.45E-06 | 0.0002 | 0.5765 |
| 17 | rs11658173  | 42499153  | G              | -0.002052 | -4.887 | Imputation | 1.45E-06 | 0.0002 | 0.5765 |
| 17 | rs9899760   | 42500602  | C              | -0.002052 | -4.887 | Imputation | 1.45E-06 | 0.0002 | 0.5765 |
| 17 | rs1869495   | 42501692  | C              | -0.002052 | -4.887 | Imputation | 1.45E-06 | 0.0002 | 0.5765 |
| 17 | rs11079133  | 42502129  | A              | -0.002052 | -4.887 | Imputation | 1.45E-06 | 0.0002 | 0.5765 |
| 17 | rs9911487   | 42506397  | T              | -0.002052 | -4.887 | Imputation | 1.45E-06 | 0.0002 | 0.5765 |
| 17 | rs11079138  | 42506960  | C              | -0.002052 | -4.887 | Imputation | 1.45E-06 | 0.0002 | 0.5765 |
| 17 | rs28412336  | 42507844  | C              | -0.002052 | -4.887 | Imputation | 1.45E-06 | 0.0002 | 0.5765 |
| 17 | rs4793102   | 42511518  | A              | -0.002052 | -4.887 | Imputation | 1.45E-06 | 0.0002 | 0.5765 |
| 17 | rs4793103   | 42511682  | A              | -0.002052 | -4.887 | Imputation | 1.45E-06 | 0.0002 | 0.5765 |
| 17 | rs79092888  | 42518758  | C              | -0.002052 | -4.887 | Imputation | 1.45E-06 | 0.0002 | 0.5765 |
| 17 | rs11652426  | 42521607  | T              | -0.002052 | -4.887 | Imputation | 1.45E-06 | 0.0002 | 0.5765 |
| 17 | rs9896740   | 42526970  | C              | -0.002052 | -4.887 | Imputation | 1.45E-06 | 0.0002 | 0.5765 |
| 17 | rs11871577  | 42528530  | C              | -0.002052 | -4.887 | Imputation | 1.45E-06 | 0.0002 | 0.5765 |
| 17 | rs850735    | 42448180  | A              | 0.002062  | 4.866  | Imputation | 1.61E-06 | 0.0002 | 0.6139 |
| 9  | rs146782711 | 79732264  | TAAATA         | -0.002013 | -4.844 | Imputation | 1.79E-06 | 0.0002 | 0.6139 |
| 3  | rs9258      | 194361556 | A              | 0.002091  | 4.823  | Imputation | 1.97E-06 | 0.0002 | 0.6853 |
| 17 | rs4792940   | 42482623  | A              | -0.002017 | -4.805 | Imputation | 2.16E-06 | 0.0002 | 0.7121 |
| 17 | rs11323148  | 42482882  | GT             | -0.002017 | -4.805 | Imputation | 2.16E-06 | 0.0002 | 0.7121 |
| 17 | rs1377808   | 42483531  | T              | -0.002017 | -4.805 | Imputation | 2.16E-06 | 0.0002 | 0.7121 |
| 17 | rs11469796  | 42485610  | GGT            | -0.002017 | -4.805 | Imputation | 2.16E-06 | 0.0002 | 0.7121 |
| 17 | rs3065774   | 42491426  | CATAT          | -0.002017 | -4.805 | Imputation | 2.16E-06 | 0.0002 | 0.7121 |
| 17 | rs3065772   | 42491485  | GTA            | -0.002017 | -4.805 | Imputation | 2.16E-06 | 0.0002 | 0.7121 |
| 17 | rs9905969   | 42492556  | C              | -0.002017 | -4.805 | Imputation | 2.16E-06 | 0.0002 | 0.7121 |
| 17 | rs9907524   | 42492860  | A              | -0.002017 | -4.805 | Imputation | 2.16E-06 | 0.0002 | 0.7121 |
| 17 | rs35752663  | 42493687  | AT             | -0.002017 | -4.805 | Imputation | 2.16E-06 | 0.0002 | 0.7121 |
| 17 | rs28571240  | 42494708  | T              | -0.002017 | -4.805 | Imputation | 2.16E-06 | 0.0002 | 0.7121 |
| 17 | rs9902085   | 42495690  | C              | -0.002017 | -4.805 | Imputation | 2.16E-06 | 0.0002 | 0.7121 |
| 17 | rs9903243   | 42497376  | C              | -0.002017 | -4.805 | Imputation | 2.16E-06 | 0.0002 | 0.7121 |
| 17 | rs71361570  | 42504203  | AAC            | -0.002017 | -4.805 | Imputation | 2.16E-06 | 0.0002 | 0.7121 |
| 17 | rs9903906   | 42504526  | A              | -0.002017 | -4.805 | Imputation | 2.16E-06 | 0.0002 | 0.7121 |
| 17 | rs11079137  | 42506828  | A              | -0.002017 | -4.805 | Imputation | 2.16E-06 | 0.0002 | 0.7121 |
| 17 | rs9913207   | 42507346  | A              | -0.002017 | -4.805 | Imputation | 2.16E-06 | 0.0002 | 0.7121 |
| 17 | rs11079140  | 42509990  | G              | -0.002017 | -4.805 | Imputation | 2.16E-06 | 0.0002 | 0.7121 |
| 17 | rs11448727  | 42514114  | A              | -0.002017 | -4.805 | Imputation | 2.16E-06 | 0.0002 | 0.7121 |
| 17 | rs62081226  | 42514116  | G              | -0.002017 | -4.805 | Imputation | 2.16E-06 | 0.0002 | 0.7121 |
| 17 | rs4793105   | 42514259  | G              | -0.002017 | -4.805 | Imputation | 2.16E-06 | 0.0002 | 0.7121 |
| 17 | rs148920267 | 42519453  | G              | -0.002017 | -4.805 | Imputation | 2.16E-06 | 0.0002 | 0.7121 |
| 17 | rs4793106   | 42522230  | G              | -0.002017 | -4.805 | Imputation | 2.16E-06 | 0.0002 | 0.7121 |
| 17 | rs34090973  | 42524892  | C              | -0.002017 | -4.805 | Imputation | 2.16E-06 | 0.0002 | 0.7121 |
| 17 | rs59861211  | 42526428  | T              | -0.002017 | -4.805 | Imputation | 2.16E-06 | 0.0002 | 0.7121 |
| 17 | rs11283092  | 42527953  | A              | -0.002017 | -4.805 | Imputation | 2.16E-06 | 0.0002 | 0.7121 |
| 17 | rs74472815  | 42508941  | A              | -0.002019 | -4.796 | Imputation | 2.25E-06 | 0.0002 | 0.7269 |
| 17 | rs11650338  | 42515331  | C              | 0.001966  | 4.787  | Imputation | 2.34E-06 | 0.0002 | 0.7393 |
| 17 | rs74548808  | 42491525  | G              | -0.002005 | -4.777 | Imputation | 2.46E-06 | 0.0002 | 0.7552 |
| 17 | rs11305518  | 42531299  | CA             | -0.001997 | -4.734 | Imputation | 3.01E-06 | 0.0002 | 0.8246 |
| 17 | rs4793119   | 42624404  | A              | 0.001958  | 4.694  | Genotyping | 3.62E-06 | 0.0002 | 0.8748 |
| 14 | rs1484081   | 42823074  | G              | 0.00205   | 4.682  | Imputation | 3.83E-06 | 0.0002 | 0.8874 |
| 17 | rs545616723 | 12260128  | GGAA           | -0.002353 | -4.662 | Imputation | 4.21E-06 | 0.0002 | 0.9084 |
| 17 | rs202099152 | 42519581  | T              | -0.001945 | -4.619 | Imputation | 5.13E-06 | 0.0002 | 0.9438 |
| 19 | rs34163270  | 14264394  | A              | -0.002089 | -4.613 | Imputation | 5.27E-06 | 0.0002 | 0.9464 |
| 12 | rs6581710   | 67042317  | A              | -0.002161 | -4.607 | Genotyping | 5.42E-06 | 0.0002 | 0.9506 |
| 3  | rs711995    | 194360927 | T              | 0.002024  | 4.584  | Genotyping | 6.00E-06 | 0.0002 | 0.964  |
| 17 | rs200988896 | 42557333  | CA             | -0.001907 | -4.573 | Imputation | 6.34E-06 | 0.0002 | 0.9708 |
| 3  | rs56173723  | 194361299 | C              | 0.001989  | 4.518  | Imputation | 8.10E-06 | 0.0002 | 0.9882 |
| 9  | rs1044214   | 86275559  | A              | 0.001993  | 4.507  | Imputation | 8.53E-06 | 0.0002 | 0.992  |
| 12 | rs11320802  | 67041982  | CT             | -0.002109 | -4.489 | Imputation | 9.24E-06 | 0.0002 | 0.995  |
| 17 | rs200198398 | 42469795  | ATTTTTT<br>TTT | -0.001879 | -4.484 | Imputation | 9.43E-06 | 0.0002 | 0.9956 |
| 11 | rs10897273  | 62200069  | T              | 0.00198   | 4.479  | Imputation | 9.67E-06 | 0.0002 | 0.996  |
| 3  | rs1675955   | 194353875 | T              | 0.001954  | 4.473  | Genotyping | 9.94E-06 | 0.0002 | 0.9968 |

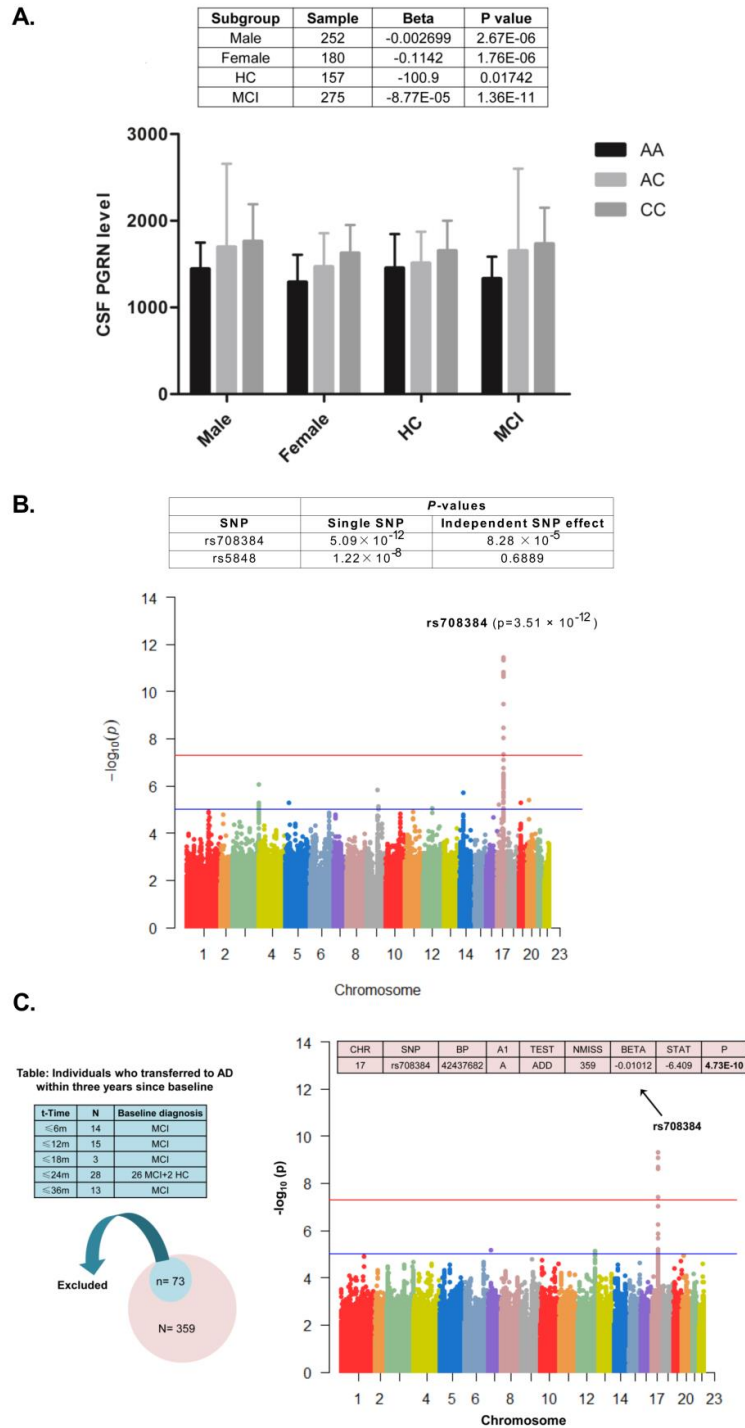

**Figure S2 Subgroup and sensitivity analysis.** **a** In the subgroup analyses, the minor allele (C) of rs708384 was associated with higher CSF levels of PGRN in different strata according to gender (Male,  $p = 2.67 \times 10^{-6}$ ; Female,  $p = 1.76 \times 10^{-6}$ ) and diagnosis at baseline (HC,  $p = 0.01742$ ; MCI,  $p = 1.36 \times 10^{-11}$ ). Notably, the effect size was drastically enlarged in HC population (beta for HC = -100.9 and beta for MCI =  $-8.77 \times 10^{-5}$ ). **b** Sensitivity analyses further adjusting these confounders are performed. Adjusting for age and baseline diagnosis did not significantly change the results ( $p = 3.51 \times 10^{-12}$  for rs708384). After adjusting for rs5848, we also found a strong, but less significant, association for rs708384 with CSF PGRN levels ( $p = 8.28 \times 10^{-5}$ ). **c** After excluding 73 individuals who progressed to AD within three years since baseline, rs708384 was still the top SNP ( $n = 359$ ,  $p = 4.73 \times 10^{-10}$ ).

**Table S2 Specificity for the association with PGRN in ADNI sample (or replicate sample/?please**

**clarify)**

| CSF biomarkers      | Other CSF biomarkers as covariates |            |                  | Correlations between PGRN and other CSF biomarkers |            |                   | Single variable linear regression based on other CSF biomarkers |         |                 |
|---------------------|------------------------------------|------------|------------------|----------------------------------------------------|------------|-------------------|-----------------------------------------------------------------|---------|-----------------|
|                     | N                                  | beta       | <i>p</i> -value  | N                                                  | r          | <i>p</i> -value   | N                                                               | beta    | <i>p</i> -value |
| Abeta42             | 432                                | -0.002935  | <b>4.62E-12</b>  | 432                                                | 0.04010273 | 0.4063            | 432                                                             | 0.06533 | 0.774           |
| T-tau               | 432                                | -0.003021  | <b>5.92E-13</b>  | 432                                                | 0.09929248 | <b>0.0394</b>     | 431                                                             | 0.01252 | 0.103           |
| P-tau               | 432                                | -0.002925  | <b>4.28E-12</b>  | 432                                                | 0.06797563 | 0.1589            | 432                                                             | 0.01174 | 0.724           |
| $\alpha$ -synuclein | 96                                 | 5.647 E-05 | <b>0.00839</b>   | 96                                                 | 0.3604819  | <b>0.0003</b>     | 262                                                             | -0.0677 | 0.305           |
| NFL                 | 102                                | 5.652E-05  | <b>0.01</b>      | 102                                                | 0.2187118  | <b>0.0272</b>     | 278                                                             | -0.0016 | 0.087           |
| sTREM2              | 432                                | 3.064 E-03 | <b>5.53 E-14</b> | 432                                                | 0.2706483  | <b>1.134 E-08</b> | 703                                                             | -0.0464 | 0.773           |

**Table S3 Associations results in the replication sample**

| SNP                                | Single SNP                              | Independent effect* |
|------------------------------------|-----------------------------------------|---------------------|
| <b>rs708384 (AA vs. AC vs. CC)</b> | <b><math>1.25 \times 10^{-5}</math></b> | <b>0.100</b>        |
| <b>rs708384 (AA vs. CC)</b>        | <b><math>5.04 \times 10^{-4}</math></b> | <b>0.045</b>        |
| rs5848                             | $4.11 \times 10^{-5}$                   | 0.88                |
| rs660240                           | 0.14                                    | NA                  |
| rs4747197                          | 0.64                                    | NA                  |
| rs646776                           | 0.14                                    | NA                  |

All analyses were adjusted for age, sex, education, *APOE* epsilon4 status, and MMSE score at baseline.

\*Both rs708384 and rs5848 were added in the regression model.

**Table S4 Enhancer enrichment analysis**

| Cell                                                                                             | 15-state core model |     |                 | 25-state core model |     |                 | H3K4me1/H3K4me3 |     |                 | H3K27ac/H3K9ac |     |                 |
|--------------------------------------------------------------------------------------------------|---------------------|-----|-----------------|---------------------|-----|-----------------|-----------------|-----|-----------------|----------------|-----|-----------------|
|                                                                                                  | O                   | E   | p               | O                   | E   | p               | O               | E   | p               | O              | E   | p               |
| E062 BLD.PER.MONUC.PC (Primary mononuclear cells from peripheral blood)                          | 0                   | 0.1 | 1               | 0                   | 0.4 | 1               | 0               | 0.6 | 1               | 0              | 0.3 | 1               |
| E034 BLD.CD3.PPC (Primary T cells from peripheral blood)                                         | 0                   | 0.4 | 1               | 0                   | 0.4 | 1               | 5               | 1.1 | <b>0.003315</b> | 0              | 0.6 | 1               |
| E045 BLD.CD4.CD25I.CD127.TMEMPC (Primary T cells effector/memory enriched from peripheral blood) | 0                   | 0.2 | 1               | 0                   | 0.4 | 1               | 2               | 0.9 | 0.223534        | 0              | 0.5 | 1               |
| E033 BLD.CD3.CPC (Primary T cells from cord blood)                                               | 0                   | 0.3 | 1               | 0                   | 0.5 | 1               | 0               | 0.5 | 1               | 0              | 0   | 1               |
| E044 BLD.CD4.CD25.CD127M.TREGPC (Primary T regulatory cells from peripheral blood)               | 0                   | 0.2 | 1               | 0                   | 0.4 | 1               | 0               | 1   | 1               | 0              | 0.6 | 1               |
| E043 BLD.CD4.CD25M.TPC (Primary T helper cells from peripheral blood)                            | 0                   | 0.4 | 1               | 0                   | 0.4 | 1               | 2               | 1.2 | 0.323081        | 0              | 0.6 | 1               |
| E039 BLD.CD4.CD25M.CD45RA.NPC (Primary T helper naive cells from peripheral blood)               | 0                   | 0.4 | 1               | 0                   | 0.4 | 1               | 1               | 1.1 | 0.698727        | 0              | 0.6 | 1               |
| E041 BLD.CD4.CD25M.IL17M.PL.TPC (Primary T helper cells PMA-I stimulated)                        | 0                   | 0.4 | 1               | 0                   | 0.4 | 1               | 2               | 1.3 | 0.366131        | 0              | 0.9 | 1               |
| E042 BLD.CD4.CD25M.IL17P.PL.TPC (Primary T helper 17 cells PMA-I stimulated)                     | 0                   | 0.3 | 1               | 0                   | 0.4 | 1               | 2               | 1   | 0.276351        | 1              | 0.5 | 0.404939        |
| E040 BLD.CD4.CD25M.CD45RO.MPC (Primary T helper memory cells from peripheral blood 1)            | 0                   | 0.3 | 1               | 0                   | 0.4 | 1               | 1               | 1.1 | 0.669157        | 0              | 0.5 | 1               |
| E037 BLD.CD4.MPC (Primary T helper memory cells from peripheral blood 2)                         | 0                   | 0.4 | 1               | 0                   | 0.4 | 1               | 0               | 1.1 | 1               | 0              | 0.7 | 1               |
| E048 BLD.CD8.MPC (Primary T CD8+ memory cells from peripheral blood)                             | 0                   | 0.3 | 1               | 0                   | 0.4 | 1               | 1               | 1   | 0.66336         | 1              | 0.5 | 0.409628        |
| E038 BLD.CD4.NPC (Primary T helper naive cells from peripheral blood)                            | 0                   | 0.3 | 1               | 0                   | 0.4 | 1               | 2               | 1   | 0.268209        | 0              | 0.4 | 1               |
| E047 BLD.CD8.NPC (Primary T CD8+ naive cells from peripheral blood)                              | 0                   | 0.4 | 1               | 0                   | 0.4 | 1               | 0               | 1.1 | 1               | 0              | 0.4 | 1               |
| E029 BLD.CD14.PC (Primary monocytes from peripheral blood)                                       | 0                   | 0.5 | 1               | 0                   | 0.4 | 1               | 0               | 0.8 | 1               | 4              | 0.4 | <b>0.000495</b> |
| E031 BLD.CD19.CPC (Primary B cells from cord blood)                                              | 0                   | 0.3 | 1               | 0                   | 0.5 | 1               | 0               | 0.7 | 1               | 0              | 0   | 1               |
| E035 BLD.CD34.PC (Primary hematopoietic stem cells)                                              | 1                   | 0.3 | 0.298827        | 0                   | 0.5 | 1               | 0               | 0.6 | 1               | 0              | 0   | 1               |
| E051 BLD.MOB.CD34.PC.M (Primary hematopoietic stem cells G-CSF-mobilized Male)                   | 0                   | 0.5 | 1               | 0                   | 0.4 | 1               | 2               | 1   | 0.261655        | 0              | 0   | 1               |
| E050 BLD.MOB.CD34.PC.F (Primary hematopoietic stem cells G-CSF-mobilized Female)                 | 2                   | 0.5 | 0.086018        | 0                   | 0.5 | 1               | 2               | 1.2 | 0.349199        | 0              | 0.8 | 1               |
| E036 BLD.CD34.CC (Primary hematopoietic stem cells short term culture)                           | 0                   | 0.5 | 1               | 0                   | 0.5 | 1               | 2               | 1   | 0.270402        | 0              | 0   | 1               |
| E032 BLD.CD19.PPC (Primary B cells from peripheral blood)                                        | 0                   | 0.5 | 1               | 0                   | 0.4 | 1               | 1               | 1   | 0.647086        | 0              | 0.4 | 1               |
| E046 BLD.CD56.PC (Primary Natural Killer cells from peripheral blood)                            | 0                   | 0.4 | 1               | 0                   | 0.4 | 1               | 1               | 1   | 0.631329        | 0              | 0.4 | 1               |
| E030 BLD.CD15.PC (Primary neutrophils from peripheral blood)                                     | 0                   | 0.4 | 1               | 0                   | 0.6 | 1               | 0               | 0.8 | 1               | 0              | 0   | 1               |
| E123 BLD.K562.CNCR (K562 Leukemia Cells)                                                         | 1                   | 0.4 | 0.317035        | 0                   | 0.4 | 1               | 4               | 0.8 | <b>0.006489</b> | 0              | 0.3 | 1               |
| E124 BLD.CD14.MONO (Monocytes-CD14+ RO01746 Primary Cells)                                       | 0                   | 0.4 | 1               | 0                   | 0.5 | 1               | 0               | 1   | 1               | 0              | 1.2 | 1               |
| E054 BRN.GANGEM.DR.NRSPHR (Ganglion Eminence derived primary cultured neurospheres)              | 3                   | 0.3 | <b>0.003593</b> | 2                   | 0.4 | 0.060306        | 2               | 0.9 | 0.234081        | 0              | 0   | 1               |
| E053 BRN.CRTX.DR.NRSPHR (Cortex derived primary cultured neurospheres)                           | 2                   | 0.5 | 0.075201        | 2                   | 0.4 | <b>0.047011</b> | 3               | 1.1 | 0.084211        | 0              | 0   | 1               |
| E071 BRN.HIPP.MID (Brain Hippocampus Middle)                                                     | 0                   | 0.4 | 1               | 0                   | 0.6 | 1               | 2               | 1.7 | 0.521587        | 4              | 1.2 | <b>0.028108</b> |
| E074 BRN.SUB.NIG (Brain Substantia Nigra)                                                        | 0                   | 0.4 | 1               | 0                   | 0.6 | 1               | 2               | 1.4 | 0.413045        | 2              | 1.2 | 0.323858        |
| E068 BRN.ANT.CAUD (Brain Anterior Caudate)                                                       | 0                   | 0.3 | 1               | 2                   | 0.6 | 0.117324        | 2               | 1.6 | 0.477345        | 2              | 1.4 | 0.404137        |
| E069 BRN.CING.GYR (Brain Cingulate Gyrus)                                                        | 0                   | 0.3 | 1               | 0                   | 0.6 | 1               | 2               | 1.4 | 0.424189        | 3              | 1.3 | 0.143567        |
| E072 BRN.INF.TMP (Brain Inferior Temporal Lobe)                                                  | 0                   | 0.3 | 1               | 2                   | 0.6 | 0.123737        | 2               | 0.9 | 0.238612        | 5              | 1.4 | <b>0.009549</b> |
| E067 BRN.ANG.GYR (Brain Angular Gyrus)                                                           | 0                   | 0.3 | 1               | 2                   | 0.6 | 0.112296        | 3               | 1.4 | 0.159161        | 4              | 1.3 | <b>0.030831</b> |
| E073 BRN.DL.PFRNTL.CRTX (Brain Dorsolateral Prefrontal Cortex)                                   | 0                   | 0.3 | 1               | 2                   | 0.6 | 0.127101        | 5               | 1.4 | <b>0.009242</b> | 5              | 1.4 | <b>0.00872</b>  |
| E070 BRN.GRM.MTRX (Brain Germinal Matrix)                                                        | 2                   | 0.3 | <b>0.031041</b> | 2                   | 0.4 | 0.059423        | 2               | 0.7 | 0.156719        | 0              | 0   | 1               |
| E082 BRN.FET.F (Fetal Brain Female)                                                              | 2                   | 0.2 | <b>0.017854</b> | 3                   | 0.3 | <b>0.003956</b> | 3               | 1   | 0.076469        | 0              | 0   | 1               |
| E081 BRN.FET.M (Fetal Brain Male)                                                                | 4                   | 0.4 | <b>0.000566</b> | 3                   | 0.4 | <b>0.008491</b> | 6               | 1.2 | <b>0.000519</b> | 0              | 0   | 1               |
| E125 BRN.NHA (NH-A Astrocytes Primary Cells)                                                     | 0                   | 0.4 | 1               | 0                   | 0.5 | 1               | 2               | 1.2 | 0.358956        | 0              | 0.7 | 1               |

Significant associations with  $p < 0.05$  are bolded. O, observed; E, expected; BLD, blood; BRN, brain



**Table S5 Tagged variants and gene expression in human blood samples**

| SNP      | Dataset | Samples | Beta   | Z           | log10 (p)    | Gene       |
|----------|---------|---------|--------|-------------|--------------|------------|
| rs708384 | [1]     | 5311    | NA     | 4.736784776 | -5.663540266 | <i>GRN</i> |
| rs850730 | [1]     | 5311    | NA     | 4.949722813 | -6.128624639 | <i>GRN</i> |
| rs5910   | [1]     | 5311    | NA     | 4.954245083 | -6.138893076 | <i>GRN</i> |
| rs5911   | [1]     | 5311    | NA     | 4.973844543 | -6.182745132 | <i>GRN</i> |
| rs708382 | [1]     | 5311    | NA     | 4.526124495 | -5.221049085 | <i>GRN</i> |
| rs850736 | [2]     | 2765    | 0.2    | 7.1429      | -11.55284197 | <i>GRN</i> |
| rs5848   | [3]     | 5257    | 0.0225 | NA          | -9.1853      | <i>GRN</i> |

Significance level  $p < 0.05$ ; NA, not available; Z-score = effect (beta)/standard error; Beta is the regression coefficient based on the effect allele. Beta  $> 0$  and Beta  $< 0$  means that this effect allele regulates increased and reduced gene expression, respectively. [1] <http://www.genenetwork.nl/bloodqtlbrowser/> [2]

<http://cnsgenomics.com/shiny/CAGE/> [3] <https://preview.ncbi.nlm.nih.gov/gap/eqt/studies/>

**Table S6 Tagged variants and gene expression in human brain tissues**

|                             | Study name                           | CHR | SNP      | BP(GRCh37) | NMISS | BETA      | STAT    | log10(P)  | PROBE        | Start    | End      | Gene Symbol (Probe) |
|-----------------------------|--------------------------------------|-----|----------|------------|-------|-----------|---------|-----------|--------------|----------|----------|---------------------|
| Brain<br>expression<br>GWAS | CER_AD                               | 17  | rs708384 | 39793208   | 195   | -0.03916  | -1.225  | -6.53E-01 | ILMN_1724250 | 39778016 | 39785996 | GRN                 |
|                             |                                      | 17  | rs708384 | 39793208   | 195   | 0.01018   | 0.4469  | -1.83E-01 | ILMN_1811702 | 39778016 | 39785996 | GRN                 |
|                             | CER_Control                          | 17  | rs708384 | 39793208   | 176   | 0.03721   | 1.245   | -6.68E-01 | ILMN_1811702 | 39778016 | 39785996 | GRN                 |
|                             |                                      | 17  | rs708384 | 39793208   | 176   | 0.03757   | 0.9701  | -4.77E-01 | ILMN_1724250 | 39778016 | 39785996 | GRN                 |
|                             |                                      | 17  | rs850737 | 39799310   | 174   | -0.01797  | -0.4062 | -1.64E-01 | ILMN_1721888 | 39805075 | 39822399 | ITGA2B              |
|                             | CER_All                              | 17  | rs708384 | 39793208   | 371   | -0.009667 | -0.3946 | -1.59E-01 | ILMN_1724250 | 39778016 | 39785996 | GRN                 |
|                             |                                      | 17  | rs850737 | 39799310   | 369   | -3.48E-02 | -1.463  | -8.40E-01 | ILMN_1724250 | 39778016 | 39785996 | GRN                 |
|                             | TX_AD                                | 17  | rs708384 | 39793208   | 200   | -0.03545  | -1.123  | -5.80E-01 | ILMN_1724250 | 39778016 | 39785996 | GRN                 |
|                             |                                      | 17  | rs708384 | 39793208   | 200   | 0.01123   | 0.5591  | -2.39E-01 | ILMN_1811702 | 39778016 | 39785996 | GRN                 |
|                             |                                      | 17  | rs708384 | 39793208   | 190   | 0.03955   | 1.193   | -6.30E-01 | ILMN_1811702 | 39778016 | 39785996 | GRN                 |
|                             | TX_Control                           | 17  | rs708384 | 39793208   | 190   | -0.02466  | -0.6202 | -2.71E-01 | ILMN_1724250 | 39778016 | 39785996 | GRN                 |
|                             |                                      | 17  | rs708384 | 39793208   | 390   | -0.03414  | -1.374  | -7.69E-01 | ILMN_1724250 | 39778016 | 39785996 | GRN                 |
|                             | TX_All                               | 17  | rs708384 | 39793208   | 390   | 0.02373   | 1.275   | -6.92E-01 | ILMN_1811702 | 39778016 | 39785996 | GRN                 |
|                             |                                      | 17  | rs850737 | 39799310   | 389   | 3.34E-02  | 1.838   | -1.17E+00 | ILMN_1811702 | 39778016 | 39785996 | GRN                 |
| 1000<br>Genomes<br>Project  | Brain_Caudate_basal_ganglia          | 17  | rs708384 | 39793208   | NA    | -0.1515   | NA      | -1.68E+00 | NA           | 39778016 | 39785996 | FAM171A2            |
|                             | Brain_Anterior_cingulate_cortex_BA24 | 17  | rs708384 | 39793208   | NA    | -0.3589   | NA      | -2.40E+00 | NA           | 39778016 | 39785996 | GRN                 |
|                             | Brain_Frontal_Cortex_BA9             | 17  | rs708384 | 39793208   | NA    | -0.2582   | NA      | -1.78E+00 | NA           | 39778016 | 39785996 | GRN                 |

CER = cerebellum; TX = temporal cortex

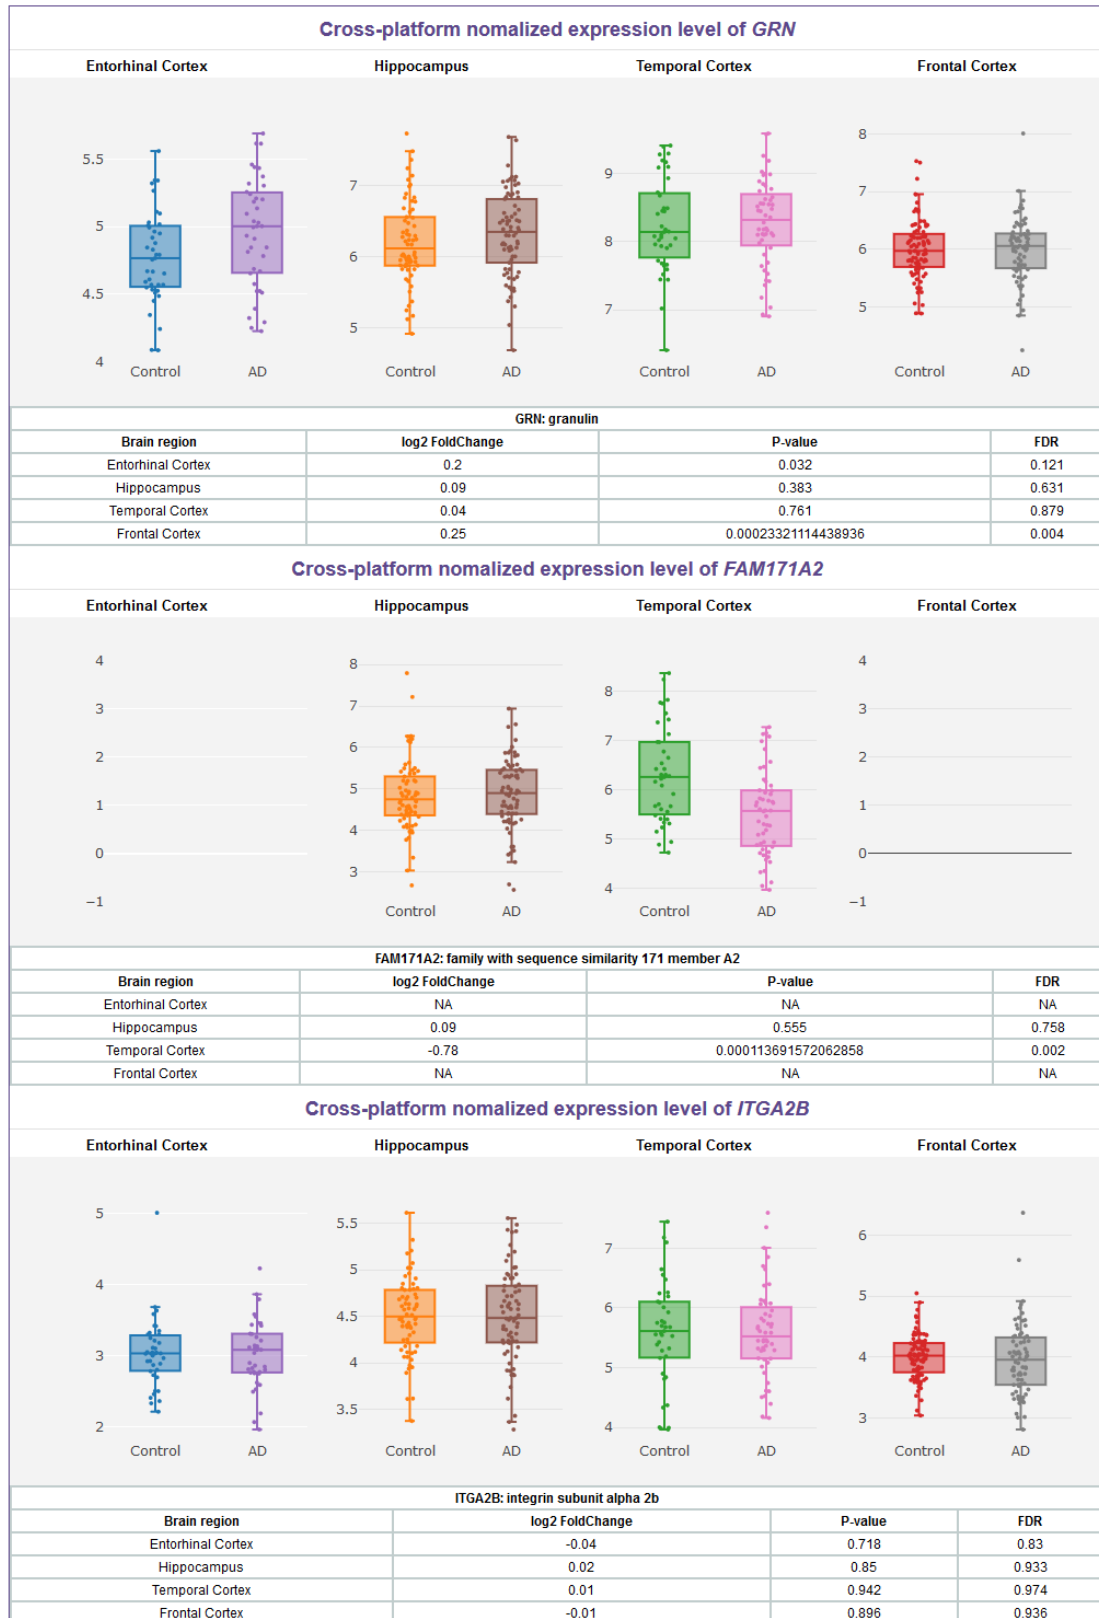

**Figure S3 Differential expression analysis for GRN, FAM171A2, and ITGA2B.** All results were adjusted for age and sex. Dataset of Entorhinal cortex: GSE26927, GSE26972, GSE48350, GSE5281; Dataset of Hippocampus: GSE28146, GSE29378, GSE36980, GSE48350, GSE5281; Dataset of Temporal cortex: GSE29652, GSE36980, GSE37263, GSE5281; Dataset of Frontal cortex: GSE12685, GSE36980, GSE5281, GSE53890, GSE66333

**Table S7 Influences of rs708384 and rs5848 on expression of *GRN-FAM171A2-ITGA2B***

| <b>SNP</b> | <b>Gene</b>     | <b>P-value (-log10)</b> | <b>Effect size</b> | <b>Tissue</b>                               |
|------------|-----------------|-------------------------|--------------------|---------------------------------------------|
| rs5848     | <i>FAM171A2</i> | 2.65                    | 0.43               | Brain_Cortex                                |
| rs5848     | <i>FAM171A2</i> | 1.98                    | -0.19              | Skin_Not_Sun_Exposed_Suprapubic             |
| rs708384   | <i>FAM171A2</i> | 1.48                    | 0.13               | Adipose_Subcutaneous                        |
| rs708384   | <i>FAM171A2</i> | 1.68                    | -0.15              | <b>Brain_Caudate_basal_ganglia</b>          |
| rs708384   | <i>FAM171A2</i> | 2.40                    | 0.10               | Cells_Transformed_fibroblasts               |
| rs708384   | <i>FAM171A2</i> | 1.96                    | 0.25               | Esophagus_Gastroesophageal_Junction         |
| rs708384   | <i>FAM171A2</i> | 1.44                    | 0.16               | Muscle_Skeletal                             |
| rs708384   | <i>FAM171A2</i> | 1.76                    | 0.12               | Nerve_Tibial                                |
| rs708384   | <i>FAM171A2</i> | 1.87                    | 0.18               | Skin_Not_Sun_Exposed_Suprapubic             |
| rs708384   | <i>FAM171A2</i> | 2.17                    | 0.15               | Skin_Sun_Exposed_Lower_leg                  |
| rs708384   | <i>FAM171A2</i> | 2.93                    | -0.17              | Thyroid                                     |
| rs5848     | <i>GRN</i>      | 6.29                    | -0.20              | Adipose_Subcutaneous                        |
| rs5848     | <i>GRN</i>      | 4.09                    | -0.26              | Adrenal_Gland                               |
| rs5848     | <i>GRN</i>      | 8.60                    | -0.34              | Artery_Aorta                                |
| rs5848     | <i>GRN</i>      | 1.65                    | -0.13              | Artery_Coronary                             |
| rs5848     | <i>GRN</i>      | 13.58                   | -0.29              | Artery_Tibial                               |
| rs5848     | <i>GRN</i>      | 1.95                    | -0.35              | Brain_Anterior_cingulate_cortex_BA24        |
| rs5848     | <i>GRN</i>      | 2.17                    | -0.25              | Brain_Caudate_basal_ganglia                 |
| rs5848     | <i>GRN</i>      | 3.33                    | -0.44              | Brain_Cortex                                |
| rs5848     | <i>GRN</i>      | 1.77                    | -0.30              | Brain_Frontal_Cortex_BA9                    |
| rs5848     | <i>GRN</i>      | 1.65                    | -0.29              | Brain_Putamen_basal_ganglia                 |
| rs5848     | <i>GRN</i>      | 2.88                    | -0.18              | Breast_Mammary_Tissue                       |
| rs5848     | <i>GRN</i>      | 6.46                    | -0.17              | Cells_Transformed_fibroblasts               |
| rs5848     | <i>GRN</i>      | 3.43                    | -0.24              | Colon_Sigmoid                               |
| rs5848     | <i>GRN</i>      | 3.20                    | -0.26              | Esophagus_Gastroesophageal_Junction         |
| rs5848     | <i>GRN</i>      | 6.23                    | -0.29              | Esophagus_Muscularis                        |
| rs5848     | <i>GRN</i>      | 9.31                    | -0.41              | Heart_Atrial_Appendage                      |
| rs5848     | <i>GRN</i>      | 4.16                    | -0.25              | Heart_Left_Ventricle                        |
| rs5848     | <i>GRN</i>      | 15.86                   | -0.43              | Nerve_Tibial                                |
| rs5848     | <i>GRN</i>      | 2.87                    | -0.30              | Ovary                                       |
| rs5848     | <i>GRN</i>      | 1.97                    | -0.14              | Pancreas                                    |
| rs5848     | <i>GRN</i>      | 1.36                    | -0.11              | Skin_Not_Sun_Exposed_Suprapubic             |
| rs5848     | <i>GRN</i>      | 2.74                    | -0.14              | Skin_Sun_Exposed_Lower_leg                  |
| rs5848     | <i>GRN</i>      | 2.91                    | -0.18              | Stomach                                     |
| rs5848     | <i>GRN</i>      | 10.44                   | -0.35              | Thyroid                                     |
| rs708384   | <i>GRN</i>      | 3.42                    | -0.13              | Adipose_Subcutaneous                        |
| rs708384   | <i>GRN</i>      | 3.65                    | -0.23              | Adrenal_Gland                               |
| rs708384   | <i>GRN</i>      | 4.84                    | -0.21              | Artery_Aorta                                |
| rs708384   | <i>GRN</i>      | 2.27                    | -0.14              | Artery_Coronary                             |
| rs708384   | <i>GRN</i>      | 9.43                    | -0.22              | Artery_Tibial                               |
| rs708384   | <i>GRN</i>      | 2.40                    | -0.36              | <b>Brain_Anterior_cingulate_cortex_BA24</b> |
| rs708384   | <i>GRN</i>      | 1.78                    | -0.26              | <b>Brain_Frontal_Cortex_BA9</b>             |
| rs708384   | <i>GRN</i>      | 2.06                    | -0.13              | Breast_Mammary_Tissue                       |

|          |               |      |       |                                     |
|----------|---------------|------|-------|-------------------------------------|
| rs708384 | <i>GRN</i>    | 4.01 | -0.12 | Cells_Transformed_fibroblasts       |
| rs708384 | <i>GRN</i>    | 1.53 | -0.13 | Colon_Sigmoid                       |
| rs708384 | <i>GRN</i>    | 1.52 | -0.14 | Esophagus_Gastroesophageal_Junction |
| rs708384 | <i>GRN</i>    | 4.32 | -0.21 | Esophagus_Muscularis                |
| rs708384 | <i>GRN</i>    | 4.76 | -0.27 | Heart_Atrial_Appendage              |
| rs708384 | <i>GRN</i>    | 2.09 | -0.15 | Heart_Left_Ventricle                |
| rs708384 | <i>GRN</i>    | 8.05 | -0.28 | Nerve_Tibial                        |
| rs708384 | <i>GRN</i>    | 1.95 | -0.23 | Ovary                               |
| rs708384 | <i>GRN</i>    | 1.89 | -0.12 | Pancreas                            |
| rs708384 | <i>GRN</i>    | 1.71 | -0.09 | Skin_Sun_Exposed_Lower_leg          |
| rs708384 | <i>GRN</i>    | 2.60 | -0.15 | Stomach                             |
| rs708384 | <i>GRN</i>    | 5.83 | -0.23 | Thyroid                             |
| rs708384 | <i>GRN</i>    | 1.35 | 0.07  | Whole_Blood                         |
| rs5848   | <i>ITGA2B</i> | 1.34 | -0.18 | Adipose_Subcutaneous                |
| rs5848   | <i>ITGA2B</i> | 1.35 | 0.22  | Colon_Sigmoid                       |
| rs5848   | <i>ITGA2B</i> | 1.90 | -0.30 | Heart_Left_Ventricle                |
| rs5848   | <i>ITGA2B</i> | 1.74 | -0.17 | Lung                                |
| rs5848   | <i>ITGA2B</i> | 1.45 | -0.18 | Skin_Sun_Exposed_Lower_leg          |
| rs5848   | <i>ITGA2B</i> | 1.83 | 0.19  | Testis                              |
| rs5848   | <i>ITGA2B</i> | 4.31 | -0.17 | Thyroid                             |
| rs708384 | <i>ITGA2B</i> | 1.54 | -0.18 | Adipose_Visceral_Omentum            |
| rs708384 | <i>ITGA2B</i> | 1.63 | -0.15 | Lung                                |
| rs708384 | <i>ITGA2B</i> | 3.50 | -0.14 | Thyroid                             |

---

**Table S8 Significant GO categories overlapped in PANTHER and CPDB analyses**

| GO        | Function                                                               | Total.genes number | Candidate.genes numl | Candidate.genes                                                                      | P.value for PANTHE | P.value_CPDE |
|-----------|------------------------------------------------------------------------|--------------------|----------------------|--------------------------------------------------------------------------------------|--------------------|--------------|
| GO:005080 | regulation of synapse organization                                     | 166                | 4                    | TIAM1; ADGRL1; NEURL1; ASIC2                                                         | 9.01E-05           | 1.03E-04     |
| GO:005080 | regulation of synapse structure or activity                            | 173                | 4                    | TIAM1; ADGRL1; NEURL1; ASIC2                                                         | 1.06E-04           | 1.32E-04     |
| GO:005196 | regulation of nervous system development                               | 866                | 7                    | FZD2; NEURL1; ASIC2; TIAM1; ADGRL1; GRIP1; DRAXIN                                    | 1.76E-04           | 1.72E-04     |
| GO:009879 | postsynapse                                                            | 466                | 5                    | GRIP1; TIAM1; NEURL1; ASIC2                                                          | 4.78E-04           | 4.47E-03     |
| GO:005196 | positive regulation of nervous system development                      | 509                | 5                    | GRIP1; TIAM1; ADGRL1; NEURL1; ASIC2                                                  | 7.12E-04           | 7.64E-04     |
| GO:004866 | neuron development                                                     | 783                | 6                    | FZD2; NEURL1; CNGB1; TIAM1; FAT4; GRIP1; DRAXIN                                      | 7.29E-04           | 8.20E-04     |
| GO:200002 | regulation of multicellular organismal development                     | 1905               | 9                    | FZD2; NEURL1; ITGA2B; ADGRL1; ASIC2; TIAM1; FAT4; GRIP1; DRAXIN                      | 9.99E-04           | 1.37E-03     |
| GO:005123 | regulation of multicellular organismal process                         | 2904               | 11                   | FZD2; NEURL1; ITGA2B; ADGRL1; ASIC2; TIAM1; FAT4; GRIP1; NOS1AP; DRAXIN              | 1.49E-03           | 6.78E-03     |
| GO:005079 | regulation of developmental process                                    | 2452               | 10                   | FZD2; NEURL1; ITGA2B; ADGRL1; ASIC2; TIAM1; FAT4; GRIP1; DRAXIN                      | 1.51E-03           | 8.04E-03     |
| GO:004319 | dendritic spine                                                        | 160                | 3                    | TIAM1; NEURL1; ASIC2                                                                 | 1.53E-03           | 1.55E-03     |
| GO:004430 | neuron spine                                                           | 162                | 3                    | TIAM1; NEURL1; ASIC2                                                                 | 1.59E-03           | 1.61E-03     |
| GO:000715 | heterophilic cell-cell adhesion via plasma membrane cell adhesion mole | 45                 | 2                    | ADGRL1; FAT4                                                                         | 1.91E-03           | 2.89E-03     |
| GO:006011 | inner ear receptor cell development                                    | 46                 | 2                    | FZD2; FAT4                                                                           | 2.00E-03           | 1.66E-03     |
| GO:000760 | phototransduction                                                      | 46                 | 2                    | CNGB1; ASIC2                                                                         | 2.00E-03           | 3.81E-03     |
| GO:003018 | neuron differentiation                                                 | 963                | 6                    | FZD2; NEURL1; CNGB1; TIAM1; FAT4; GRIP1; DRAXIN                                      | 2.11E-03           | 2.72E-03     |
| GO:004222 | response to cocaine                                                    | 53                 | 2                    | EFTUD2; TIAM1                                                                        | 2.63E-03           | 2.68E-03     |
| GO:005171 | cellular response to stimulus                                          | 6433               | 17                   | GRIP1; FZD2; UBQLN1; NEURL1; CNGB1; ITGA2B; ADGRL1; ASIC2; EFTUD2; TIAM1; MACROD2    | 2.66E-03           | 2.72E-02     |
| GO:000739 | nervous system development                                             | 2245               | 9                    | FZD2; NEURL1; CNGB1; ADGRL1; NHSL1; ASIC2; TIAM1; MACROD2; FAT4; GRIP1; DRAXIN       | 3.16E-03           | 3.09E-04     |
| GO:004249 | mechanoreceptor differentiation                                        | 61                 | 2                    | FZD2; FAT4                                                                           | 3.46E-03           | 3.69E-03     |
| GO:000958 | detection of light stimulus                                            | 61                 | 2                    | CNGB1; ASIC2                                                                         | 3.46E-03           | 5.55E-03     |
| GO:005196 | positive regulation of synapse assembly                                | 65                 | 2                    | ADGRL1; ASIC2                                                                        | 3.92E-03           | 4.44E-03     |
| GO:004869 | generation of neurons                                                  | 1470               | 7                    | FZD2; NEURL1; CNGB1; NHSL1; TIAM1; FAT4; GRIP1; DRAXIN                               | 3.95E-03           | 1.00E-03     |
| GO:000716 | signal transduction                                                    | 4878               | 14                   | GRIP1; FZD2; UBQLN1; NEURL1; CNGB1; ITGA2B; ADGRL1; ASIC2; TIAM1; FAT4; GRN; KSR2; N | 3.99E-03           | 2.32E-02     |
| GO:009859 | plasma membrane region                                                 | 1098               | 6                    | NEURL1; CNGB1; TIAM1; ADGRL1; GRIP1; NOS1AP                                          | 4.05E-03           | 4.67E-03     |
| GO:001406 | postsynaptic density                                                   | 229                | 3                    | TIAM1; NEURL1                                                                        | 4.20E-03           | 4.58E-02     |
| GO:009957 | postsynaptic specialization                                            | 231                | 3                    | TIAM1; NEURL1                                                                        | 4.30E-03           | 4.65E-02     |
| GO:003227 | asymmetric synapse                                                     | 234                | 3                    | TIAM1; NEURL1                                                                        | 4.46E-03           | 4.76E-02     |
| GO:009898 | neuron to neuron synapse                                               | 238                | 3                    | TIAM1; NEURL1                                                                        | 4.68E-03           | 4.87E-02     |
| GO:002200 | neurogenesis                                                           | 1562               | 7                    | FZD2; NEURL1; CNGB1; NHSL1; TIAM1; FAT4; GRIP1; DRAXIN                               | 5.51E-03           | 1.55E-03     |
| GO:004846 | cell development                                                       | 1562               | 7                    | FZD2; NEURL1; CNGB1; TIAM1; FAT4; GRIP1; DRAXIN                                      | 5.51E-03           | 2.86E-02     |
| GO:007234 | response to anesthetic                                                 | 78                 | 2                    | EFTUD2; TIAM1                                                                        | 5.58E-03           | 5.55E-03     |
| GO:015003 | distal axon                                                            | 267                | 3                    | CNGB1; TIAM1; ADGRL1                                                                 | 6.42E-03           | 7.50E-03     |
| GO:005196 | regulation of synapse assembly                                         | 86                 | 2                    | ADGRL1; ASIC2                                                                        | 6.73E-03           | 7.60E-03     |
| GO:005124 | positive regulation of multicellular organismal process                | 1655               | 7                    | NEURL1; ASIC2; TIAM1; ADGRL1; GRIP1; NOS1AP                                          | 7.53E-03           | 2.50E-02     |

**Table S9 Pathway analysis**

| <b>gene_set_id</b>                                        | <b>gene_set_name</b>                                        | <b>p-value</b> |
|-----------------------------------------------------------|-------------------------------------------------------------|----------------|
| REACTOME:R-HSA-373760                                     | LICAM interactions                                          | 2.49E-06       |
| REACTOME:R-HSA-190873                                     | Gap junction degradation                                    | 3.90E-05       |
| REACTOME:R-HSA-112308                                     | Presynaptic depolarization and calcium channel opening      | 5.51E-05       |
| REACTOME:R-HSA-5423646                                    | Aflatoxin activation and detoxification                     | 5.90E-05       |
| REACTOME:R-HSA-437239                                     | Recycling pathway of L1                                     | 7.37E-05       |
| REACTOME:R-HSA-196025                                     | Formation of annular gap junctions                          | 1.41E-04       |
| REACTOME:R-HSA-373752                                     | Netrin-1 signaling                                          | 2.38E-04       |
| REACTOME:R-HSA-381753                                     | Olfactory Signaling Pathway                                 | 2.64E-04       |
| REACTOME:R-HSA-428542                                     | Regulation of commissural axon pathfinding by SLIT and ROBO | 5.65E-04       |
| REACTOME:R-HSA-3928665                                    | EPH-ephrin mediated repulsion of cells                      | 7.06E-04       |
| REACTOME:R-HSA-2682334                                    | EPH-Ephrin signaling                                        | 8.82E-04       |
| REACTOME:R-HSA-157858                                     | Gap junction trafficking and regulation                     | 8.95E-04       |
| KEGG_ARRHYTHMOGENIC_RIGHT_VENTRICULAR_CARDIOMYOPATHY_ARVC | Arrhythmogenic right ventricular cardiomyopathy (ARVC)      | 1.01E-04       |
| KEGG_ONE_CARBON_POOL_BY_FOLATE                            | One carbon pool by folate                                   | 2.07E-04       |
| KEGG_CARDIAC_MUSCLE_CONTRACTION                           | Cardiac muscle contraction                                  | 4.39E-04       |
| KEGG_HYPERTROPHIC_CARDIOMYOPATHY_HCM                      | Hypertrophic cardiomyopathy (HCM)                           | 7.33E-04       |

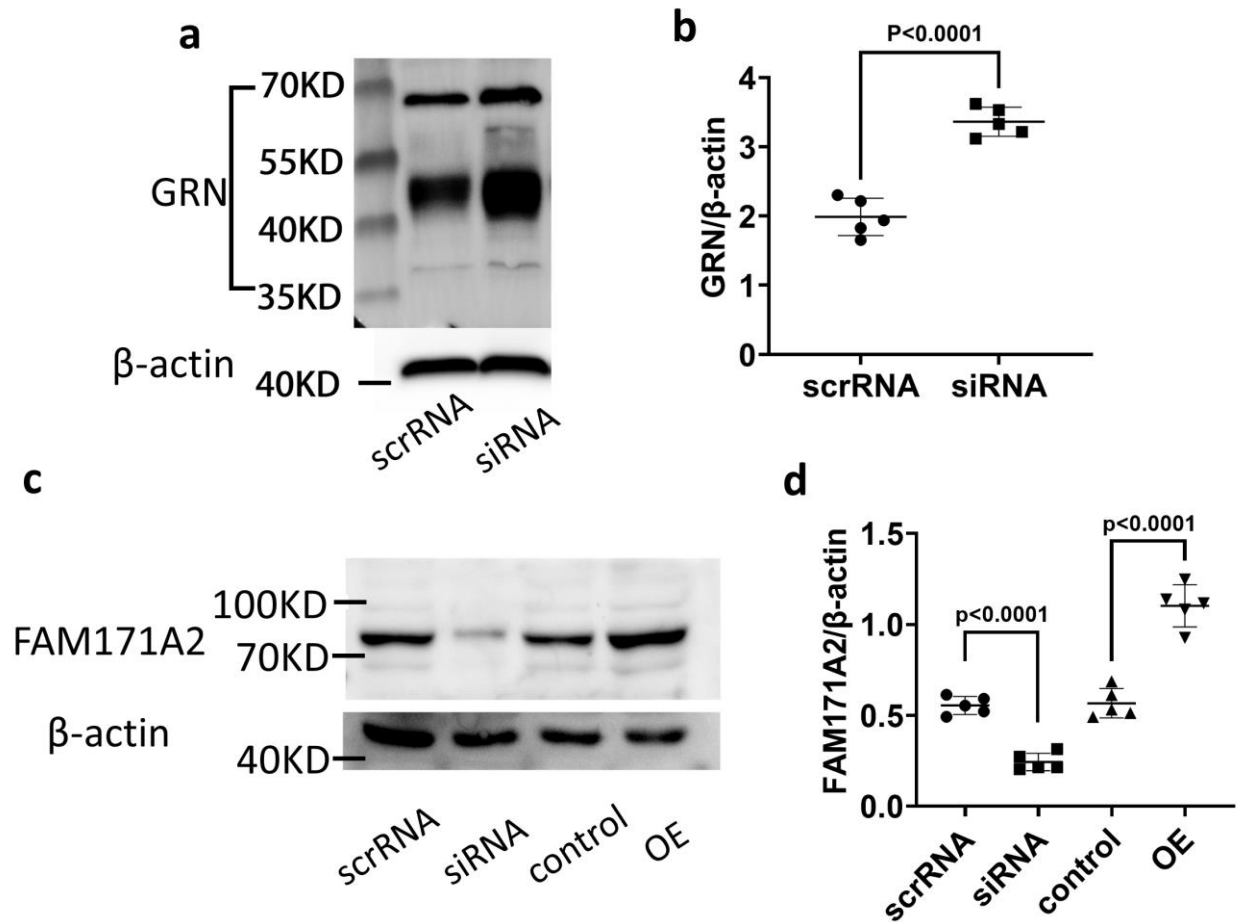

**Figure S4 Knockdown of FAM171A2 stimulates intracellular GRN expression.** a, b The intracellular expression of GRN. n = 5 per group. The data was analyzed by the t-test ( $p < 0.0001$ ). c, d The efficiency of FAM171A2 siRNA and over-expression (OE). n = 5 per group. The data was analyzed by one-way ANOVA ( $p < 0.0001$ ), followed by Tukey post hoc test ( $p < 0.0001$  scrRNA vs siRNA;  $p < 0.0001$  control vs OE).



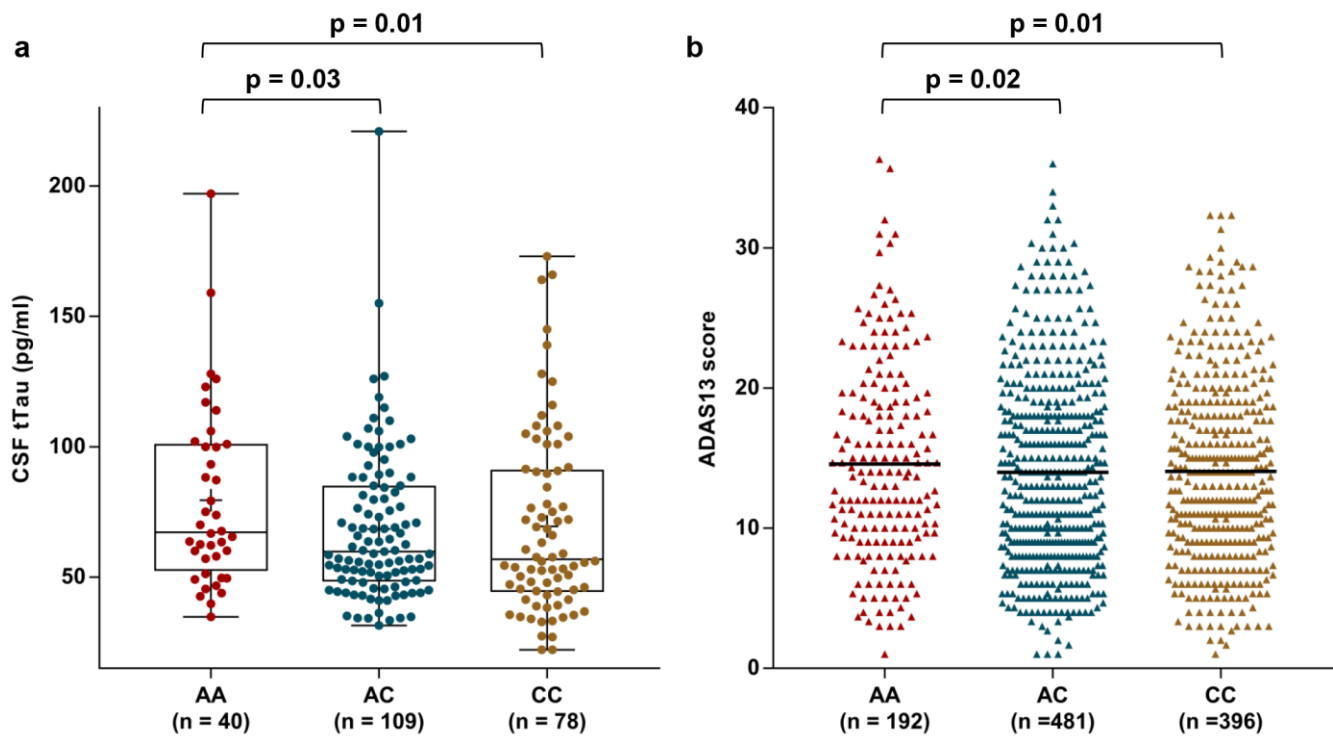

**Figure S5 Association of rs708384 genotype with global cognition and CSF tau levels.** The ‘AA’ genotype of the rs708384 was significantly associated with higher CSF tau levels in HC population (a) and poorer global cognition in total (b)

**Table S10 Variants tagged by top SNP and susceptibility of neurodegenerative diseases**

| <b>SNP</b>      | <b>Position</b>    | <b>Effect allele</b> | <b>Other allele</b> | <b><i>p</i> value for AD*</b> | <b><i>p</i> value for PD<sup>#</sup></b> | <b><i>p</i> value for ALS<sup>#</sup></b> | <b><i>p</i> value for FTD<sup>#</sup></b> |
|-----------------|--------------------|----------------------|---------------------|-------------------------------|------------------------------------------|-------------------------------------------|-------------------------------------------|
| <b>rs708384</b> | <b>17:42437682</b> | <b>A</b>             | <b>C</b>            | <b>&lt;0.05</b>               | <b>1.42e-05</b>                          | <b>&gt;0.05</b>                           | <b>0.04</b>                               |
| rs708383        | 17:42437754        | A                    | G                   | <0.05                         | 1.35e-05                                 | NA                                        | NA                                        |
| rs850737        | 17:42443784        | C                    | T                   | <0.05                         | 3.41e-06                                 | >0.05                                     | 0.04                                      |
| rs850736        | 17:42446420        | C                    | G                   | <0.05                         | <0.05                                    | NA                                        | NA                                        |
| rs850734        | 17:42449025        | G                    | C                   | <0.05                         | <0.05                                    | NA                                        | NA                                        |
| rs5910          | 17:42449789        | A                    | G                   | <0.05                         | 2.51e-06                                 | NA                                        | 0.04                                      |
| rs850733        | 17:42451305        | A                    | G                   | <0.01                         | 3.00e-06                                 | NA                                        | NA                                        |
| rs5911          | 17:42453065        | C                    | A                   | <0.05                         | 2.69e-06                                 | NA                                        | 0.04                                      |
| rs850732        | 17:42454243        | T                    | C                   | <0.05                         | 2.33e-06                                 | NA                                        | NA                                        |
| rs850730        | 17:42454463        | C                    | G                   | <0.05                         | <0.05                                    | NA                                        | 0.04                                      |
| rs850729        | 17:42454806        | T                    | C                   | <0.05                         | 2.49e-06                                 | NA                                        | NA                                        |

Significant associations with  $p < 0.05$  were bolded. Beta, overall estimated effect size for the effect allele; SE, overall standard error for effect size estimate; *p* value, meta-analysis *p* value using regression coefficients (beta and standard error). Beta is the regression coefficient, based on the effect allele using an additive model. Position, chromosome 17 (GRCh37); Beta > 0 and Beta < 0 means that this effect allele increases and reduces AD risk, respectively. None of these variants were identified in stage 1+2 GWAS.

\*IGAP stage-1 GWAS; the above loci cannot be found in stage-2 GWAS.

# Meta *p* values in previous GWAS for PD, ALS, and FTD [14-16].
